# Supplementary material for: The relationship between functional status, physical fitness and cognitive performance in physically active older adults: A pilot study
Source: PubMed Central journal article supplement (PMC5890973; doi:10.1371/journal.pone.0194918), 2018-04-09
Supplement: pone.0194918.s001.pdf [file pone.0194918.s001.pdf]

| CODE  | AGE | AGE GROUPS | SEX | EMPLOYED | JOB.T | MARITAL | YRS ED | HIGH.ED.O |   |
|-------|-----|------------|-----|----------|-------|---------|--------|-----------|---|
| UR001 | 69  | 1          | 1   | 1        | 0     | 0       | 1      | 22        | 3 |
| UR002 | 77  | 2          | 1   | 1        | 0     | 0       | 4      | 16        | 3 |
| UR003 | 65  | 1          | 2   | 2        | 1     | 1       | 3      | 14        | 3 |
| UR004 | 71  | 2          | 1   | 1        | 0     | 0       | 2      | 14        | 3 |
| UR005 | 65  | 1          | 1   | 1        | 0     | 0       | 1      | 22        | 3 |
| UR006 | 66  | 1          | 1   | 1        | 0     | 0       | 1      | 24        | 3 |
| UR007 | 70  | 1          | 2   | 2        | 0     | 0       | 1      | 16        | 3 |
| UR008 | 70  | 1          | 1   | 1        | 1     | 1       | 1      | 12        | 2 |
| UR009 | 68  | 1          | 2   | 2        | 0     | 0       | 1      | 12        | 2 |
| UR010 | 65  | 1          | 2   | 2        | 0     | 0       | 1      | 20        | 3 |
| UR011 | 68  | 1          | 1   | 1        | 0     | 0       | 1      | 15        | 3 |
| UR012 | 68  | 1          | 1   | 1        | 0     | 0       | 1      | 16        | 3 |
| UR013 | 70  | 1          | 1   | 1        | 0     | 0       | 1      | 18        | 3 |
| UR014 | 67  | 1          | 1   | 1        | 0     | 0       | 1      | 14        | 3 |
| UR015 | 72  | 2          | 1   | 1        | 0     | 0       | 1      | 23        | 3 |
| UR016 | 78  | 2          | 2   | 2        | 1     | 1       | 3      | 16        | 3 |
| UR017 | 77  | 2          | 1   | 1        | 0     | 0       | 1      | 25        | 3 |
| UR018 | 74  | 2          | 2   | 2        | 1     | 3       | 1      | 7,5       | 1 |
| UR019 | 68  | 1          | 1   | 1        | 0     | 0       | 2      | 18        | 3 |
| UR020 | 81  | 2          | 1   | 1        | 0     | 0       | 1      | 18        | 3 |
| UR021 | 83  | 2          | 2   | 2        | 0     | 0       | 1      | 23        | 3 |
| UR022 | 67  | 1          | 2   | 2        | 0     | 0       | 1      | 23        | 3 |
| UR023 | 70  | 1          | 1   | 1        | 0     | 0       | 1      | 17        | 3 |
| UR024 | 76  | 2          | 1   | 1        | 1     | 2       | 1      | 22        | 3 |
| UR025 | 71  | 2          | 1   | 1        | 0     | 0       | 1      | 15        | 3 |
| UR026 | 78  | 2          | 1   | 1        | 0     | 0       | 1      | 20        | 3 |
| UR027 | 79  | 2          | 2   | 2        | 0     | 0       | 4      | 13        | 2 |
| UR028 | 75  | 2          | 2   | 2        | 0     | 0       | 4      | 14        | 2 |
| UR029 | 84  | 2          | 2   | 2        | 0     | 0       | 4      | 15        | 2 |
| UR030 | 74  | 2          | 1   | 1        | 1     | 1       | 1      | 16        | 3 |
| UR031 | 70  | 1          | 2   | 2        | 0     | 0       | 3      | 3         | 1 |
| UR032 | 65  | 1          | 2   | 2        | 0     | 0       | 3      | 7         | 1 |
| UR033 | 71  | 2          | 2   | 2        | 0     | 0       | 1      | 10        | 1 |
| UR034 | 67  | 1          | 2   | 2        | 0     | 0       | 4      | 6         | 1 |
| UR035 | 73  | 2          | 2   | 2        | 0     | 0       | 4      | 8         | 1 |
| UR036 | 78  | 2          | 2   | 2        | 0     | 0       | 4      | 3         | 1 |
| UR037 | 66  | 1          | 2   | 2        | 0     | 0       | 4      | 6         | 1 |
| UR038 | 71  | 2          | 2   | 2        | 0     | 0       | 4      | 8         | 1 |
| UR039 | 71  | 2          | 2   | 2        | 0     | 0       | 4      | 7         | 1 |
| UR040 | 67  | 1          | 2   | 2        | 0     | 0       | 4      | 4         | 1 |
| UR041 | 69  | 1          | 2   | 2        | 0     | 0       | 1      | 8         | 1 |
| UR042 | 75  | 2          | 2   | 2        | 1     | 1       | 1      | 12        | 3 |
| UR043 | 67  | 1          | 2   | 2        | 1     | 3       | 3      | 16        | 3 |
| UR044 | 67  | 1          | 1   | 1        | 0     | 0       | 1      | 12        | 2 |
| UR045 | 74  | 2          | 1   | 1        | 1     | 1       | 1      | 18        | 2 |
| UR046 | 66  | 1          | 1   | 1        | 1     | 4       | 1      | 9         | 1 |
| UR047 | 66  | 1          | 2   | 2        | 1     | 3       | 1      | 10        | 1 |
| UR048 | 72  | 2          | 1   | 1        | 0     | 0       | 1      | 9         | 1 |
| UR049 | 72  | 2          | 2   | 2        | 0     | 0       | 1      | 9         | 1 |

|       |    |   |   |   |   |   |      |   |
|-------|----|---|---|---|---|---|------|---|
| UR050 | 70 | 1 | 1 | 0 | 0 | 1 | 17   | 3 |
| UR051 | 71 | 2 | 2 | 0 | 0 | 1 | 12   | 2 |
| UR052 | 79 | 2 | 2 | 0 | 0 | 3 | 9    | 1 |
| UR053 | 66 | 1 | 1 | 0 | 0 | 1 | 16   | 3 |
| UR054 | 71 | 2 | 1 | 1 | 3 | 1 | 15   | 2 |
| UR055 | 68 | 1 | 1 | 0 | 0 | 1 | 13,5 | 2 |
| UR056 | 76 | 2 | 1 | 1 | 2 | 1 | 30   | 3 |
| UR057 | 71 | 2 | 2 | 1 | 2 | 1 | 19   | 3 |
| UR058 | 68 | 1 | 2 | 0 | 0 | 2 | 8    | 1 |
| UR059 | 68 | 1 | 2 | 0 | 0 | 2 | 14   | 3 |
| UR060 | 70 | 1 | 2 | 0 | 0 | 4 | 6    | 1 |
| UR061 | 68 | 1 | 2 | 0 | 0 | 1 | 6    | 1 |
| UR062 | 73 | 2 | 2 | 0 | 0 | 4 | 8    | 1 |
| UR063 | 69 | 1 | 2 | 0 | 0 | 1 | 9    | 1 |
| UR064 | 68 | 1 | 2 | 0 | 0 | 1 | 7    | 1 |
| UR065 | 66 | 1 | 2 | 0 | 0 | 2 | 7    | 1 |
| UR066 | 72 | 2 | 2 | 0 | 0 | 2 | 7    | 1 |
| UR067 | 69 | 1 | 2 | 0 | 0 | 4 | 11   | 1 |
| UR068 | 73 | 2 | 2 | 0 | 0 | 4 | 7    | 1 |
| UR069 | 71 | 2 | 2 | 0 | 0 | 1 | 10   | 1 |
| UR070 | 69 | 1 | 2 | 0 | 0 | 1 | 19   | 3 |



|   |   |   |   |   |   |   |   |   |
|---|---|---|---|---|---|---|---|---|
| 4 | 1 | 1 | 0 | 0 | 0 | 0 | 1 | 0 |
| 4 | 2 | 0 | 0 | 0 | 0 | 0 | 0 | 1 |
| 4 | 1 | 1 | 1 | 0 | 0 | 0 | 2 | 0 |
| 4 | 2 | 0 | 0 | 0 | 0 | 0 | 0 | 1 |
| 4 | 2 | 1 | 0 | 0 | 0 | 0 | 1 | 0 |
| 3 | 1 | 0 | 0 | 0 | 1 | 0 | 1 | 0 |
| 4 | 1 | 0 | 0 | 0 | 0 | 0 | 0 | 1 |
| 5 | 1 | 0 | 0 | 0 | 0 | 0 | 0 | 1 |
| 3 | 1 | 1 | 1 | 0 | 0 | 0 | 2 | 0 |
| 4 | 1 | 1 | 0 | 0 | 0 | 0 | 1 | 0 |
| 3 | 1 | 0 | 0 | 0 | 1 | 0 | 1 | 0 |
| 3 | 1 | 1 | 0 | 0 | 0 | 0 | 1 | 0 |
| 3 | 1 | 0 | 0 | 1 | 0 | 0 | 1 | 0 |
| 3 | 1 | 1 | 0 | 0 | 0 | 0 | 1 | 0 |
| 3 | 1 | 1 | 0 | 0 | 0 | 0 | 1 | 0 |
| 3 | 1 | 0 | 0 | 0 | 0 | 0 | 0 | 0 |
| 3 | 1 | 1 | 0 | 0 | 0 | 0 | 1 | 0 |
| 3 | 1 | 1 | 1 | 1 | 1 | 0 | 4 | 0 |
| 3 | 1 | 1 | 0 | 0 | 0 | 0 | 1 | 0 |
| 3 | 1 | 1 | 0 | 0 | 0 | 0 | 1 | 0 |
| 5 | 1 | 0 | 0 | 0 | 0 | 0 | 0 | 1 |

| MEDs | NO. MEDs | NAME/DOSAGE           | HEIGHT | WEIGHT | BMI   | WAIST CIR | HIP CIRC |
|------|----------|-----------------------|--------|--------|-------|-----------|----------|
| 0    | 0        |                       | 180    | 71,8   | 22,2  | 90        | 101,5    |
| 1    | 3        | ELTROXIN - 0.15MG ; F | 180    | 100,4  | 31    | 115,5     | 128      |
| 1    | 1        | LIPOTAIN              | 170    | 59     | 20,4  | 85        | 94,5     |
| 1    | 3        | TRI-PLAN - 25MG ; DIS | 176    | 85     | 27,4  | 105,5     | 105      |
| 1    | 1        | COXFLAM - 15MG        | 178    | 90,5   | 28,3  | 109       | 109      |
| 1    | 3        | PHARMA - PRESS - 10N  | 166    | 89,3   | 31,9  | 109,5     | 113,5    |
| 0    | 0        |                       | 162    | 73     | 27,9  | 93        | 114,5    |
| 1    | 1        | PHARMA - PRESS - 10N  | 169    | 67,2   | 23,6  | 76,75     | 92,8     |
| 1    | 1        | LISORETIC - 20MG      | 160    | 66,7   | 26,1  | 81,5      | 109,5    |
| 1    | 3        | BURINEX K ; SIMVACOI  | 156    | 63,7   | 26,2  | 81        | 102      |
| 1    | 0        |                       | 157    | 78,1   | 31,7  | 104       | 107      |
| 0    | 0        |                       | 180    | 83,4   | 25,7  | 85,5      | 104      |
| 0    | 0        |                       | 177,4  | 71     | 22,7  | 92,5      | 98       |
| 1    | 2        | ATACANDT ; CRESTOR    | 174,5  | 87,1   | 27,7  | 102,5     | 104,5    |
| 1    | 1        | CRESTOR               | 178    | 88,3   | 27,9  | 98        | 109      |
| 0    | 0        |                       | 161    | 56,4   | 21,7  | 76        | 90       |
| 1    | 2        | GLUCOPHAGE ; INSULI   | 182    | 93     | 28,1  | 101,95    | 110,15   |
| 1    | 1        | DIOVAN - 30MG         | 167,5  | 93,6   | 33,2  | 108,3     | 132,25   |
| 1    | 1        | FLAXOIL               | 174    | 71,3   | 23,5  | 85        | 97       |
| 0    | 0        |                       | 170,5  | 70,3   | 24,1  | 89,55     | 96,5     |
| 1    | 1        | BUDAFLAME             | 159,5  | 54,8   | 21,4  | 77        | 96,45    |
| 0    | 0        |                       | 164    | 63,4   | 23,7  | 73,5      | 99,7     |
| 1    | 1        | ATTACAND              | 180    | 78,6   | 24,2  | 88,5      | 101      |
| 0    | 0        |                       | 176    | 87,6   | 28,3  | 96        | 107      |
| 1    | 2        | SINOPREN ; GLAMARYI   | 169    | 93,7   | 32,8  | 110       | 106,5    |
| 1    | 0        |                       | 168    | 66,4   | 23,5  | 91        | 97       |
| 1    | 0        |                       | 161    | 55,8   | 21,5  | 76        | 96       |
| 1    | 1        | TENORMIN              | 156,5  | 56,7   | 23,3  | 73        | 102      |
| 1    | 1        | TAREG - 80MG          | 159    | 56,8   | 22,5  | 84        | 95       |
| 1    | 1        | LINISPARIL 10 - 20MG  | 173,5  | 95,7   | 32    | 108,5     | 116      |
| 0    | 0        |                       | 153,5  | 72,9   | 31,1  | 100,5     | 121      |
| 1    | 1        | ASTHAVENT             | 148    | 56,2   | 25,7  | 81        | 101      |
| 1    | 2        | RADAQ - 12.5MG ; PH/  | 155,5  | 61,8   | 25,4  | 83        | 100,5    |
| 0    | 0        |                       | 151    | 61,7   | 27,1  | 85,5      | 104      |
| 0    | 0        |                       | 150    | 68,5   | 30,4  | 92        | 113      |
| 1    | 0        |                       | 147    | 54,2   | 25,1  | 80,5      | 98,5     |
| 0    | 0        |                       | 161,4  | 78,9   | 30,5  | 93        | 111      |
| 1    | 0        |                       | 156    | 74,6   | 30,7  | 95        | 114,5    |
| 1    | 0        |                       | 159,6  | 85,5   | 33,4  | 101       | 120      |
| 0    | 0        |                       | 163,2  | 69     | 26,1  | 84        | 107      |
| 1    | 0        |                       | 152,5  | 83,5   | 36,1  | 106       | 120,5    |
| 0    | 0        |                       | 171    | 89,1   | 30,5  | 100       | 107      |
| 0    | 0        |                       | 164    | 63,6   | 23,82 | 84        | 98       |
| 1    | 1        | APPROVAL - 150MG      | 175    | 97,1   | 31,7  | 105       | 107,5    |
| 0    | 0        |                       | 170,1  | 86,4   | 29,6  | 101       | 108      |
| 1    | 4        | PHARMA PRESS, R200C   | 163    | 73,4   | 27,2  | 91,5      | 101,6    |
| 1    | 1        | TENDOR                | 155    | 73,4   | 30,6  | 94,2      | 104,8    |
| 1    | 1        | WATER TABLET          | 179    | 68,6   | 21,4  | 79,45     | 96,6     |
| 0    | 0        |                       | 147,5  | 60,4   | 27,7  | 79,35     | 103,75   |

|   |                        |       |      |      |       |        |
|---|------------------------|-------|------|------|-------|--------|
| 1 | 0                      | 185   | 89,2 | 26,2 | 98    | 105    |
| 0 | 0                      | 160   | 65,4 | 25,2 | 78    | 105    |
| 1 | 4 ZILDEN - 60MG; SIMVA | 157   | 71,4 | 28,6 | 92    | 110,75 |
| 0 | 0                      | 171   | 80,8 | 27,7 | 95    | 104,5  |
| 1 | 1 DISPRIN ( HALF)      | 177   | 84,8 | 27,1 | 102,5 | 106    |
| 1 | 1 FORIDAL - 200MG POV  | 155   | 90   | 37,5 | 110   | 110    |
| 0 | 0                      | 173   | 70,9 | 23,7 | 89    | 98     |
| 0 | 0                      | 165   | 52,5 | 19,3 | 66    | 94     |
| 1 | 3 PHARMAPRESS, RIDAC   | 160,5 | 97,8 | 38,2 | 119   | 138    |
| 1 | 2 2/DAY                | 162   | 76,6 | 29,2 | 96    | 113    |
| 1 | 1 ASTHAVENT            | 144,5 | 55,5 | 26,8 | 84    | 98     |
| 1 | 2 HYPACE/ RIDAQ - 1/DA | 153,5 | 64,5 | 27,2 | 79,5  | 105,5  |
| 1 | 2 METFORMEN / GLYCO    | 150   | 56,4 | 25,1 | 85    | 96     |
| 1 | 2 HYPACE/ RIDAQ- 1/DA  | 161   | 87,1 | 33,6 | 111   | 118    |
| 1 | 2 HYPACE/ RIDAQ - 1/DA | 157   | 67,3 | 27,4 | 102   | 107    |
| 0 | 0                      | 146   | 62   | 29,1 | 86    | 105,5  |
| 1 | 2 RADAQ (1/DAY)/ AMPI  | 149,5 | 69,3 | 30,8 | 95    | 107,5  |
| 1 | 13 PHARMAPRESS / METF  | 153,5 | 86,2 | 36,4 | 112   | 125,5  |
| 1 | 2 RIDAQ / PHARMAPRES   | 148   | 58,5 | 26,7 | 90    | 97     |
| 1 | 2 RIDAQ / PHARMAPRES   | 157,2 | 72,3 | 29,4 | 101   | 116    |
| 0 | 0                      | 158   | 79   | 30,9 | 103   | 110    |

| W:H      | BICEP | TRICEPS | S-ILIAC | SUBSCAP | Total | Body Densi % BF |          | B-CURLS |
|----------|-------|---------|---------|---------|-------|-----------------|----------|---------|
| 0,8867   | 12,5  | 12      | 7,5     | 12,5    | 44,5  | 1,039539        | 26,17246 | 22      |
| 0,902344 | 9,5   | 22      | 22,5    | 19      | 73    | 1,022749        | 33,98988 | 22      |
| 0,899471 | 5     | 13,5    | 6,5     | 10,5    | 35,5  | 1,047346        | 22,62336 | 10      |
| 1,004762 | 10,5  | 17,5    | 19      | 25,5    | 72,5  | 1,025373        | 32,75129 | 22      |
| 1        | 6     | 18      | 19      | 17      | 60    | 1,032986        | 29,19311 | 24      |
| 0,964758 | 24    | 17      | 26,5    | 8,5     | 76    | 1,026113        | 32,40313 | 17      |
| 0,812227 | 17    | 16      | 19      | 10      | 62    | 1,030059        | 30,55485 | 14      |
| 0,827047 | 2,4   | 2,8     | 4,1     | 8,2     | 17,5  | 1,064669        | 14,93341 | 17      |
| 0,744292 | 7,5   | 21      | 15      | 15      | 58,5  | 1,032461        | 29,43691 | 17      |
| 0,794118 | 8     | 19      | 13,5    | 17,5    | 58    | 1,033914        | 28,76321 | 18      |
| 0,971963 | 10    | 16,5    | 20      | 24      | 70,5  | 1,027356        | 31,24876 | 25      |
| 0,822115 | 4     | 10      | 8       | 15      | 37    | 1,044995        | 23,68634 | 22      |
| 0,943878 | 5,3   | 9,5     | 7,7     | 10,1    | 32,6  | 1,047647        | 22,48726 | 22      |
| 0,980861 | 8,3   | 13,3    | 19      | 22      | 62,6  | 1,031014        | 30,10996 | 25      |
| 0,899083 | 7,1   | 16      | 19      | 19      | 61,1  | 1,029647        | 30,7471  | 18      |
| 0,844444 | 7,2   | 18      | 6       | 12,8    | 44    | 1,036194        | 27,70955 | 18      |
| 0,925556 | 4,7   | 6,7     | 11,3    | 14,6    | 37,3  | 1,04112         | 25,44936 | 16      |
| 0,818904 | 5,4   | 19,6    | 12,8    | 22,2    | 60    | 1,029332        | 30,89419 | 16      |
| 0,876289 | 3,3   | 9       | 6,9     | 11,6    | 30,8  | 1,050013        | 21,4226  | 20      |
| 0,927979 | 6,2   | 8       | 8,9     | 11,1    | 34,2  | 1,04187         | 25,1071  | 14      |
| 0,798341 | 2,1   | 11,4    | 10      | 8,2     | 31,7  | 1,043135        | 24,53098 | 10      |
| 0,737212 | 3,7   | 20,3    | 8,3     | 8,2     | 40,5  | 1,042928        | 24,62513 | 19      |
| 0,876238 | 6     | 12,5    | 10,4    | 12,5    | 41,4  | 1,041109        | 25,45455 | 17      |
| 0,897196 | 8,3   | 17,2    | 12,4    | 18,4    | 56,3  | 1,030262        | 30,46032 | 20      |
| 1,032864 | 8,2   | 16,3    | 17,2    | 23,2    | 64,9  | 1,028403        | 31,32901 | 16      |
| 0,938144 | 7,2   | 17,2    | 11,4    | 15,3    | 51,1  | 1,032101        | 29,604   | 13      |
| 0,791667 | 6,2   | 19      | 5       | 7,6     | 37,8  | 1,039944        | 25,98716 | 18      |
| 0,715686 | 4,3   | 17      | 8       | 8,3     | 37,6  | 1,041713        | 25,17879 | 17      |
| 0,884211 | 7     | 10,7    | 9       | 11,5    | 38,2  | 1,037626        | 27,05049 | 15      |
| 0,935345 | 9,1   | 24      | 18,8    | 23      | 74,9  | 1,023264        | 33,7463  | 20      |
| 0,830579 | 9,5   | 17      | 25,75   | 30,25   | 82,5  | 1,022243        | 34,2291  | 16      |
| 0,80198  | 14,5  | 20,1    | 18,5    | 27,9    | 81    | 1,024775        | 33,03265 | 13      |
| 0,825871 | 10,8  | 19,5    | 15      | 20,8    | 66,1  | 1,027901        | 31,56374 | 17      |
| 0,822115 | 11,8  | 20,35   | 20,8    | 24,6    | 77,55 | 1,025154        | 32,85412 | 13      |
| 0,814159 | 9     | 20,75   | 19      | 21      | 69,75 | 1,025619        | 32,6355  | 20      |
| 0,817259 | 10,4  | 21,1    | 13,4    | 21,4    | 66,3  | 1,024977        | 32,93783 | 14      |
| 0,837838 | 12,2  | 19,5    | 25      | 26,5    | 83,2  | 1,023636        | 33,57022 | 18      |
| 0,829694 | 11,7  | 18,1    | 23      | 23,8    | 76,6  | 1,023868        | 33,46095 | 17      |
| 0,841667 | 18,3  | 30      | 26,5    | 31      | 105,8 | 1,015031        | 37,66964 | 17      |
| 0,785047 | 8     | 17,9    | 11,7    | 19,7    | 57,3  | 1,033434        | 28,98548 | 19      |
| 0,879668 | 9,6   | 19,3    | 29,7    | 31,8    | 90,4  | 1,020147        | 35,224   | 17      |
| 0,934579 | 7,2   | 19,3    | 10,5    | 14      | 51    | 1,033373        | 29,01383 | 12      |
| 0,857143 | 5,2   | 10,6    | 8,7     | 17,5    | 42    | 1,041933        | 25,0784  | 19      |
| 0,976744 | 14,35 | 18,2    | 22      | 21      | 75,55 | 1,025869        | 32,51764 | 21      |
| 0,935185 | 5,7   | 7,4     | 6,5     | 14,4    | 34    | 1,044873        | 23,74186 | 21      |
| 0,900591 | 8,8   | 10,8    | 17,8    | 28,8    | 66,2  | 1,02989         | 30,63388 | 14      |
| 0,898855 | 14,7  | 22,8    | 16,5    | 27,6    | 81,6  | 1,024168        | 33,31937 | 11      |
| 0,822464 | 2,5   | 3,8     | 4,9     | 6,3     | 17,5  | 1,063857        | 15,28827 | 15      |
| 0,764819 | 10,1  | 16,5    | 19,2    | 18,6    | 64,4  | 1,028208        | 31,42001 | 12      |

|          |       |       |       |       |       |          |          |    |
|----------|-------|-------|-------|-------|-------|----------|----------|----|
| 0,933333 | 8,4   | 18,4  | 11    | 17    | 54,8  | 1,033437 | 28,98429 | 20 |
| 0,742857 | 5,5   | 17,2  | 16    | 10,5  | 49,2  | 1,03598  | 27,80836 | 15 |
| 0,8307   | 15    | 18,5  | 28,25 | 20,25 | 82    | 1,018756 | 35,88684 | 16 |
| 0,909091 | 5,1   | 15,8  | 11,7  | 19,1  | 51,7  | 1,036654 | 27,49775 | 16 |
| 0,966981 | 5,4   | 14,3  | 9,8   | 14,3  | 43,8  | 1,039161 | 26,34576 | 19 |
| 1        | 8     | 21    | 17,5  | 31    | 77,5  | 1,024766 | 33,03711 | 19 |
| 0,908163 | 3,8   | 8,3   | 6,4   | 15,5  | 34    | 1,044061 | 24,11031 | 23 |
| 0,702128 | 3     | 10    | 5     | 8,4   | 26,4  | 1,053013 | 20,07969 | 21 |
| 0,862319 | 14    | 19,75 | 18,6  | 23,75 | 76,1  | 1,025265 | 32,80212 | 19 |
| 0,849558 | 7,3   | 16,1  | 13    | 19,8  | 56,2  | 1,033559 | 28,92785 | 27 |
| 0,857143 | 11    | 21,25 | 18    | 20    | 70,25 | 1,026641 | 32,15478 | 19 |
| 0,753555 | 17,25 | 22    | 20    | 18,5  | 77,75 | 1,024678 | 33,07865 | 22 |
| 0,885417 | 5,9   | 16    | 18,25 | 21,4  | 61,55 | 1,029041 | 31,03057 | 23 |
| 0,940678 | 19    | 21,75 | 21,5  | 20,5  | 82,75 | 1,022567 | 34,07604 | 25 |
| 0,953271 | 25    | 24,75 | 21,5  | 23,5  | 94,75 | 1,019268 | 35,64287 | 20 |
| 0,815166 | 8,8   | 18,2  | 16,5  | 22,8  | 66,3  | 1,029849 | 30,65315 | 23 |
| 0,883721 | 21,25 | 21    | 18,25 | 21,5  | 82    | 1,021598 | 34,53514 | 22 |
| 0,89243  | 19    | 24,25 | 17,5  | 24    | 84,75 | 1,021913 | 34,38556 | 20 |
| 0,927835 | 14,25 | 20,75 | 18    | 17,5  | 70,5  | 1,025326 | 32,77324 | 23 |
| 0,87069  | 12,25 | 15,5  | 23    | 25,75 | 76,5  | 1,023903 | 33,44408 | 22 |
| 0,936364 | 18    | 37    | 26    | 35    | 116   | 1,013325 | 38,49079 | 19 |



| 6 MinWk | TANGAIT LEFT | LOG TANGAIT LEFT | TANGAIT RIGHT | LOG TANGAIT RIGHT | SEM TAN LEFT |
|---------|--------------|------------------|---------------|-------------------|--------------|
| 785     | 31           | 1,491361694      | 31            | 1,491361694       | 30           |
| 445     | 31           | 1,491361694      | 31            | 1,491361694       | 30           |
| 530     | 31           | 1,491361694      | 31            | 1,491361694       | 30           |
| 700     | 31           | 1,491361694      | 31            | 1,491361694       | 30           |
| 745     | 31           | 1,491361694      | 31            | 1,491361694       | 30           |
| 610     | 31           | 1,491361694      | 31            | 1,491361694       | 30           |
| 495     | 31           | 1,491361694      | 31            | 1,491361694       | 30           |
| 520     | 31           | 1,491361694      | 31            | 1,491361694       | 30           |
| 610     | 25,4         | 1,404833717      | 31            | 1,491361694       | 30           |
| 676     | 31           | 1,491361694      | 31            | 1,491361694       | 30           |
| 645     | 31           | 1,491361694      | 31            | 1,491361694       | 30           |
| 786     | 31           | 1,491361694      | 31            | 1,491361694       | 30           |
| 665     | 31           | 1,491361694      | 31            | 1,491361694       | 30           |
| 650     | 31           | 1,491361694      | 31            | 1,491361694       | 30           |
| 672     | 31           | 1,491361694      | 31            | 1,491361694       | 30           |
| 610     | 31           | 1,491361694      | 31            | 1,491361694       | 30           |
| 645     | 31           | 1,491361694      | 31            | 1,491361694       | 30           |
| 552     | 31           | 1,491361694      | 31            | 1,491361694       | 30           |
| 560     | 31           | 1,491361694      | 31            | 1,491361694       | 30           |
| 630     | 31           | 1,491361694      | 31            | 1,491361694       | 30           |
| 530     | 31           | 1,491361694      | 31            | 1,491361694       | 30           |
| 717     | 31           | 1,491361694      | 31            | 1,491361694       | 30           |
| 672     | 31           | 1,491361694      | 31            | 1,491361694       | 30           |
| 618,5   | 31           | 1,491361694      | 31            | 1,491361694       | 30           |
| 605     | 31           | 1,491361694      | 31            | 1,491361694       | 30           |
| 560     | 31           | 1,491361694      | 31            | 1,491361694       | 30           |
| 517     | 31           | 1,491361694      | 31            | 1,491361694       | 30           |
| 582,5   | 31           | 1,491361694      | 31            | 1,491361694       | 30           |
| 647,5   | 31           | 1,491361694      | 31            | 1,491361694       | 30           |
| 597,5   | 31           | 1,491361694      | 31            | 1,491361694       | 30           |
| 442     | 6            | 0,77815125       | 11            | 1,041392685       | 30           |
| 525     | 31           | 1,491361694      | 31            | 1,491361694       | 30           |
| 485     | 31           | 1,491361694      | 15            | 1,176091259       | 30           |
| 437,5   | 29,1         | 1,463892989      | 31            | 1,491361694       | 30           |
| 443,3   | 9            | 0,954242509      | 31            | 1,491361694       | 30           |
| 444     | 31           | 1,491361694      | 31            | 1,491361694       | 30           |
| 460     | 31           | 1,491361694      | 31            | 1,491361694       | 30           |
| 432     | 31           | 1,491361694      | 31            | 1,491361694       | 30           |
| 460     | 31           | 1,491361694      | 31            | 1,491361694       | 30           |
| 472,5   | 31           | 1,491361694      | 31            | 1,491361694       | 30           |
| 525     | 12,5         | 1,096910013      | 31            | 1,491361694       | 30           |
| 532,5   | 31           | 1,491361694      | 31            | 1,491361694       | 30           |
| 602     | 31           | 1,491361694      | 31            | 1,491361694       | 30           |
| 734,5   | 31           | 1,491361694      | 31            | 1,491361694       | 30           |
| 476,5   | 6,5          | 0,812913357      | 8,9           | 0,949390007       | 30           |
| 307,5   | 31           | 1,491361694      | 31            | 1,491361694       | 30           |
| 303,5   | 31           | 1,491361694      | 31            | 1,491361694       | 30           |
| 307,5   | 31           | 1,491361694      | 31            | 1,491361694       | 30           |
| 306,5   | 31           | 1,491361694      | 31            | 1,491361694       | 30           |

|       |     |             |       |             |    |
|-------|-----|-------------|-------|-------------|----|
| 520   | 31  | 1,491361694 | 31    | 1,491361694 | 30 |
| 510   | 31  | 1,491361694 | 31    | 1,491361694 | 30 |
| 412,5 | 1   | 0           | 1     | 0           | 30 |
| 574,4 | 31  | 1,491361694 | 31    | 1,491361694 | 30 |
| 517,5 | 31  | 1,491361694 | 31    | 1,491361694 | 30 |
| 570   | 31  | 1,491361694 | 31    | 1,491361694 | 30 |
| 665   | 31  | 1,491361694 | 31    | 1,491361694 | 30 |
| 535   | 31  | 1,491361694 | 31    | 1,491361694 | 30 |
| 414,5 | 31  | 1,491361694 | 31    | 1,491361694 | 30 |
| 580   | 31  | 1,491361694 | 31    | 1,491361694 | 30 |
| 539   | 31  | 1,491361694 | 31    | 1,491361694 | 30 |
| 488   | 6,8 | 0,832508913 | 16,83 | 1,226084116 | 30 |
| 464   | 31  | 1,491361694 | 31    | 1,491361694 | 30 |
| 483   | 31  | 1,491361694 | 31    | 1,491361694 | 30 |
| 516   | 31  | 1,491361694 | 31    | 1,491361694 | 30 |
| 597,2 | 31  | 1,491361694 | 31    | 1,491361694 | 30 |
| 525   | 31  | 1,491361694 | 31    | 1,491361694 | 30 |
| 374   | 31  | 1,491361694 | 31    | 1,491361694 | 30 |
| 622,5 | 31  | 1,491361694 | 31    | 1,491361694 | 30 |
| 540,6 | 31  | 1,491361694 | 31    | 1,491361694 | 30 |
| 482,2 | 31  | 1,491361694 | 31    | 1,491361694 | 30 |

| SEM TAN RIGHT | COMP | 6 STEPS | 10 METRE | LOG 10 METRE | COMPLETE | TIMED UP&GO |
|---------------|------|---------|----------|--------------|----------|-------------|
| 30            | 1    | 6       | 24,6     | 1,390935107  | 1        | 7,5         |
| 30            | 1    | 4       | 20,7     | 1,315970345  | 1        | 11,7        |
| 30            | 1    | 7       | 40       | 1,602059991  | 1        | 8,8         |
| 30            | 1    | 6,2     | 26       | 1,414973348  | 1        | 6,9         |
| 30            | 1    | 6,2     | 21,8     | 1,338456494  | 1        | 7,1         |
| 30            | 1    | 6,7     | 50       | 1,698970004  | 1        | 7,2         |
| 30            | 1    | 5       | 26,3     | 1,419955748  | 1        | 8,9         |
| 30            | 1    | 4,2     | 20,3     | 1,307496038  | 1        | 9,7         |
| 30            | 0    | 5,4     | 31,5     | 1,498310554  | 1        | 7,63        |
| 30            | 1    | 8,6     | 43,2     | 1,635483747  | 1        | 7,41        |
| 30            | 1    | 6,6     | 37,4     | 1,572871602  | 1        | 6,04        |
| 30            | 1    | 4,4     | 21,5     | 1,33243846   | 1        | 5,5         |
| 30            | 1    | 4,8     | 25,7     | 1,409933123  | 1        | 6,34        |
| 30            | 1    | 4,3     | 24,9     | 1,396199347  | 1        | 4,6         |
| 30            | 1    | 6,3     | 37       | 1,568201724  | 1        | 7,6         |
| 30            | 1    | 7,8     | 34,1     | 1,532754379  | 1        | 6,1         |
| 30            | 1    | 3,8     | 21,7     | 1,336459734  | 1        | 6,5         |
| 30            | 1    | 11,8    | 49,5     | 1,694605199  | 1        | 7,56        |
| 30            | 1    | 3,95    | 26,52    | 1,42357352   | 1        | 7,7         |
| 30            | 1    | 5,7     | 33,9     | 1,530199698  | 1        | 7,8         |
| 30            | 1    | 8,6     | 49,4     | 1,693726949  | 1        | 7,2         |
| 30            | 1    | 4,8     | 24,17    | 1,38327665   | 1        | 7,42        |
| 30            | 1    | 7,8     | 37,4     | 1,572871602  | 1        | 8,49        |
| 30            | 1    | 5,2     | 30       | 1,477121255  | 1        | 6,18        |
| 30            | 1    | 4,2     | 24,3     | 1,385606274  | 1        | 7,1         |
| 30            | 1    | 6,2     | 33,2     | 1,521138084  | 1        | 9,13        |
| 30            | 1    | 4,2     | 21,1     | 1,324282455  | 1        | 6,74        |
| 30            | 1    | 5,8     | 28       | 1,447158031  | 1        | 6,13        |
| 30            | 1    | 4,2     | 24,3     | 1,385606274  | 1        | 7,74        |
| 30            | 1    | 6       | 27,5     | 1,439332694  | 1        | 6,6         |
| 30            | 1    | 7,6     | 59       | 1,770852012  | 1        | 8,34        |
| 30            | 1    | 4,7     | 35,6     | 1,551449998  | 1        | 5,28        |
| 30            | 1    | 8,1     | 47       | 1,672097858  | 1        | 7,84        |
| 30            | 0    | 5,7     | 48,2     | 1,683047038  | 1        | 8,57        |
| 30            | 1    | 6       | 46       | 1,662757832  | 1        | 8,45        |
| 30            | 1    | 5,6     | 43,3     | 1,636487896  | 1        | 7,44        |
| 30            | 1    | 4,8     | 35       | 1,544068044  | 1        | 6,82        |
| 30            | 1    | 6       | 37,9     | 1,57863921   | 1        | 7,62        |
| 30            | 1    | 6,4     | 36,5     | 1,562292864  | 1        | 8,17        |
| 30            | 1    | 6,9     | 46       | 1,662757832  | 1        | 5,64        |
| 30            | 0    | 7,1     | 57       | 1,755874856  | 1        | 5,82        |
| 30            | 1    | 4,6     | 25       | 1,397940009  | 1        | 9,42        |
| 30            | 1    | 4,5     | 24,3     | 1,385606274  | 1        | 9           |
| 30            | 1    | 3,9     | 17,6     | 1,245512668  | 1        | 4,66        |
| 30            | 0    | 10,2    | 25,2     | 1,401400541  | 0        | 8,3         |
| 30            | 1    | 21      | 104      | 2,017033339  | 1        | 11,23       |
| 30            | 1    | 13      | 81       | 1,908485019  | 1        | 8,8         |
| 30            | 1    | 6,1     | 34,4     | 1,536558443  | 1        | 7,36        |
| 30            | 1    | 9       | 56,2     | 1,749736316  | 1        | 8,87        |

|    |   |      |       |             |   |      |
|----|---|------|-------|-------------|---|------|
| 30 | 1 | 5,1  | 22,8  | 1,357934847 | 1 | 6,84 |
| 30 | 1 | 5,5  | 36,2  | 1,558708571 | 1 | 7,2  |
| 30 | 0 | 5,7  | 10,8  | 1,033423755 | 0 | 9,08 |
| 30 | 1 | 4,7  | 22,5  | 1,352182518 | 1 | 5,9  |
| 30 | 1 | 6,9  | 35,7  | 1,552668216 | 1 | 8,93 |
| 30 | 1 | 3,3  | 15,9  | 1,201397124 | 1 | 6,74 |
| 30 | 1 | 7,9  | 33,5  | 1,525044807 | 1 | 5,35 |
| 30 | 1 | 8,4  | 51,4  | 1,710963119 | 1 | 5,51 |
| 30 | 1 | 6,7  | 48,1  | 1,682145076 | 1 | 6,5  |
| 30 | 1 | 12,6 | 67    | 1,826074803 | 1 | 5,5  |
| 30 | 1 | 6,5  | 53,57 | 1,728921646 | 1 | 5,5  |
| 30 | 0 | 8,3  | 31,1  | 1,492760389 | 0 | 5,8  |
| 30 | 1 | 3,8  | 31    | 1,491361694 | 1 | 5,8  |
| 30 | 1 | 7    | 48    | 1,681241237 | 1 | 5,9  |
| 30 | 1 | 5    | 28,6  | 1,456366033 | 1 | 5,3  |
| 30 | 1 | 7,1  | 49,39 | 1,693639026 | 1 | 5,7  |
| 30 | 1 | 8,7  | 33    | 1,51851394  | 0 | 5,2  |
| 30 | 1 | 8,7  | 39,76 | 1,599446376 | 1 | 5,6  |
| 30 | 1 | 11,7 | 40,57 | 1,608205008 | 1 | 6,3  |
| 30 | 1 | 8    | 47    | 1,672097858 | 1 | 6,4  |
| 30 | 1 | 6,6  | 34,9  | 1,542825427 | 1 | 7,3  |

| COMPLETE 5 Sit to Stands | SIT TO STAND | COMPLETE GRIP LEFT | GRIP RIGHT | FR1   | FR2   |      |      |
|--------------------------|--------------|--------------------|------------|-------|-------|------|------|
| 1                        | 8            | 16                 | 1          | 28,95 | 28,75 | 90   | 93   |
| 1                        | 11           | 13                 | 1          | 29,4  | 34,05 | 86   | 87   |
| 1                        | 15           | 10                 | 1          | 18,35 | 21,6  | 89   | 90   |
| 1                        | 13           | 12                 | 1          | 30    | 33,55 | 92   | 91   |
| 1                        | 9            | 18                 | 1          | 26,5  | 26,5  | 89   | 90   |
| 1                        | 12           | 12                 | 1          | 34,45 | 30,2  | 84   | 85   |
| 1                        | 13,3         | 10                 | 1          | 19,65 | 20,35 | 76   | 78   |
| 1                        | 12,8         | 13                 | 1          | 30,4  | 33,2  | 80   | 80   |
| 1                        | 12,6         | 12                 | 1          | 24,85 | 27,7  | 84   | 84   |
| 1                        | 10,2         | 13                 | 1          | 19,25 | 21    | 76   | 77   |
| 1                        | 9,8          | 16                 | 1          | 26,75 | 31,45 | 81   | 82   |
| 1                        | 9,8          | 15                 | 1          | 32,8  | 36,5  | 88   | 90   |
| 1                        | 9,4          | 16                 | 1          | 28,65 | 37,9  | 90   | 92   |
| 1                        | 8,8          | 17                 | 1          | 39,65 | 36,2  | 90   | 90   |
| 1                        | 9,1          | 16                 | 1          | 34,3  | 36,45 | 90   | 90   |
| 1                        | 9,5          | 14                 | 1          | 23,05 | 24,8  | 83   | 86   |
| 1                        | 12,8         | 11                 | 1          | 29,25 | 31,05 | 87,7 | 91,7 |
| 1                        | 14,2         | 10                 | 1          | 19,25 | 19,05 | 82,3 | 83,5 |
| 1                        | 11,67        | 13                 | 1          | 34,65 | 31,95 | 86   | 86   |
| 1                        | 10,4         | 13                 | 1          | 20,55 | 17,85 | 82,2 | 81   |
| 1                        | 16,2         | 9                  | 1          | 18,8  | 20,15 | 80   | 83   |
| 1                        | 11,4         | 12                 | 1          | 24,6  | 25,5  | 88   | 86   |
| 1                        | 12,5         | 11                 | 1          | 29,55 | 34    | 87   | 87   |
| 1                        | 10,8         | 14                 | 1          | 31,2  | 35,85 | 77   | 78   |
| 1                        | 9,7          | 17                 | 1          | 29    | 31,35 | 85   | 86   |
| 1                        | 12,3         | 12                 | 1          | 19,85 | 23,6  | 86   | 85   |
| 1                        | 10,2         | 14                 | 1          | 12,5  | 19,65 | 78   | 81   |
| 1                        | 11,5         | 14                 | 1          | 20,75 | 19,45 | 80   | 82   |
| 1                        | 11,8         | 15                 | 1          | 21    | 23,45 | 78   | 79   |
| 1                        | 10,2         | 13                 | 1          | 25,25 | 28,6  | 93   | 94   |
| 1                        | 13,01        | 11                 | 1          | 12,9  | 14,85 | 70,2 | 73,2 |
| 1                        | 10,77        | 14                 | 1          | 16,8  | 16,55 | 75,3 | 74,8 |
| 1                        | 9,8          | 15                 | 1          | 21,45 | 17,65 | 75,6 | 75   |
| 1                        | 11,7         | 12                 | 1          | 13,5  | 14,55 | 70   | 71,4 |
| 1                        | 13,62        | 11                 | 1          | 11,6  | 24,4  | 73   | 78,2 |
| 1                        | 12,51        | 12                 | 1          | 19,8  | 17,85 | 78,5 | 76,5 |
| 1                        | 12,87        | 13                 | 1          | 15    | 13,3  | 76,5 | 77,3 |
| 1                        | 10,34        | 13                 | 1          | 14,95 | 18,05 | 81,4 | 82,3 |
| 1                        | 11,47        | 13                 | 1          | 20,6  | 19,15 | 81   | 81,7 |
| 1                        | 11,7         | 13                 | 1          | 20,55 | 18,75 | 84,3 | 82,7 |
| 1                        | 9,3          | 17                 | 1          | 24    | 26,95 | 70,3 | 75,1 |
| 1                        | 17,9         | 8                  | 1          | 27,45 | 36,7  | 82   | 80   |
| 1                        | 10           | 14                 | 1          | 23,7  | 25,5  | 83   | 83   |
| 1                        | 10,9         | 13                 | 1          | 28,75 | 28,15 | 85   | 86   |
| 1                        | 12,1         | 12                 | 1          | 22,25 | 24,2  | 78   | 79   |
| 1                        | 23           | 7                  | 1          | 28,8  | 25,45 | 70   | 74   |
| 1                        | 16,6         | 10                 | 1          | 21,55 | 22,3  | 65,5 | 67,8 |
| 1                        | 12,7         | 12                 | 1          | 33,5  | 36,6  | 86,2 | 88,3 |
| 1                        | 16,6         | 11                 | 1          | 18,7  | 19,15 | 72,2 | 75,7 |

|   |       |    |   |       |       |    |      |
|---|-------|----|---|-------|-------|----|------|
| 1 | 11,8  | 12 | 1 | 34,55 | 42,6  | 92 | 94   |
| 1 | 11,1  | 12 | 1 | 16,7  | 16    | 80 | 81   |
| 1 | 14,6  | 9  | 1 | 15,75 | 17,45 | 81 | 82   |
| 1 | 11,8  | 11 | 1 | 34,5  | 31,35 | 83 | 82   |
| 1 | 14,8  | 10 | 1 | 29,35 | 26,8  | 85 | 88   |
| 1 | 10,6  | 13 | 1 | 30    | 30,1  | 76 | 76   |
| 1 | 9,16  | 16 | 1 | 28,65 | 30,3  | 85 | 85   |
| 1 | 10,9  | 13 | 1 | 20,85 | 11,6  | 84 | 84   |
| 1 | 13,8  | 13 | 1 | 22    | 16,8  | 85 | 86   |
| 1 | 10,4  | 14 | 1 | 23,7  | 25    | 82 | 82   |
| 1 | 11,6  | 13 | 1 | 22,05 | 20,6  | 67 | 68   |
| 1 | 9,2   | 16 | 1 | 15,9  | 18,35 | 78 | 78   |
| 1 | 11,2  | 13 | 1 | 19,35 | 19,05 | 74 | 69   |
| 1 | 11,74 | 14 | 1 | 19,95 | 21,9  | 78 | 81   |
| 1 | 9,46  | 16 | 1 | 26,15 | 25    | 69 | 75,7 |
| 1 | 12,7  | 11 | 1 | 18,5  | 18,2  | 72 | 72   |
| 1 | 12,4  | 12 | 1 | 23,75 | 24,75 | 71 | 75   |
| 1 | 11,56 | 14 | 1 | 20,5  | 22,05 | 76 | 76   |
| 1 | 9,7   | 16 | 1 | 22,85 | 24,2  | 66 | 66   |
| 1 | 14,9  | 10 | 1 | 20,4  | 23    | 79 | 77   |
| 1 | 13,3  | 11 | 1 | 22,7  | 24,6  | 81 | 82   |

| FR3 | AVERAGE       | COMPLETE 6CIT | LOG 6CIT    | TOTAL PHYSICAL ACT.TIME |
|-----|---------------|---------------|-------------|-------------------------|
|     | 91 91,33333   | 1             | 7 0,845098  | 872                     |
|     | 87 86,66667   | 1             | 1 0         | 1264                    |
|     | 90 89,66667   | 1             | 3 0,477121  | 1240                    |
|     | 93 92         | 1             | 9 0,954243  | 1310                    |
|     | 90 89,66667   | 1             | 3 0,477121  | 927                     |
|     | 87 85,33333   | 1             | 1 0         | 1459                    |
|     | 80 78         | 1             | 1 0         | 1453                    |
|     | 81 80,33333   | 1             | 9 0,954243  | 2550                    |
|     | 85 84,33333   | 1             | 1 0         | 1420                    |
|     | 77 76,66667   | 1             | 1 0         | 1740                    |
|     | 82 81,66667   | 1             | 3 0,477121  | 1012                    |
|     | 90 89,33333   | 1             | 3 0,477121  | 5295                    |
|     | 91 91         | 1             | 3 0,477121  | 1560                    |
|     | 88 89,33333   | 1             | 3 0,477121  | 1845                    |
|     | 90 90         | 1             | 3 0,477121  | 965                     |
|     | 87 85,33333   | 1             | 5 0,69897   | 1288                    |
|     | 92,7 90,7     | 1             | 7 0,845098  | 2375                    |
|     | 83,7 83,16667 | 1             | 3 0,477121  | 2730                    |
|     | 87 86,33333   | 1             | 1 0         | 1895                    |
|     | 81,7 81,63333 | 1             | 1 0         | 1309                    |
|     | 81 81,33333   | 1             | 3 0,477121  | 2105                    |
|     | 89 87,66667   | 1             | 1 0         | 1910                    |
|     | 88 87,33333   | 1             | 1 0         | 740                     |
|     | 80 78,33333   | 1             | 15 1,176091 | 750                     |
|     | 86 85,66667   | 1             | 1 0         | 1790                    |
|     | 87 86         | 1             | 17 1,230449 | 665                     |
|     | 81 80         | 1             | 1 0         | 1900                    |
|     | 84 82         | 1             | 3 0,477121  | 1660                    |
|     | 80 79         | 1             | 3 0,477121  | 987                     |
|     | 93 93,33333   | 1             | 1 0         | 363                     |
|     | 72 71,8       | 1             | 9 0,954243  | 400                     |
|     | 74,5 74,86667 | 1             | 9 0,954243  | 1205                    |
|     | 75,8 75,46667 | 1             | 9 0,954243  | 3505                    |
|     | 73,4 71,6     | 1             | 17 1,230449 | 624                     |
|     | 78,5 76,56667 | 1             | 3 0,477121  | 1330                    |
|     | 81,5 78,83333 | 1             | 5 0,69897   | 670                     |
|     | 80,2 78       | 1             | 11 1,041393 | 2270                    |
|     | 81,2 81,63333 | 1             | 1 0         | 3330                    |
|     | 80 80,9       | 1             | 11 1,041393 | 1350                    |
|     | 87,4 84,8     | 1             | 7 0,845098  | 970                     |
|     | 76,4 73,93333 | 1             | 3 0,477121  | 1065                    |
|     | 82 81,33333   | 1             | 7 0,845098  | 285                     |
|     | 84 83,33333   | 1             | 1 0         | 1520                    |
|     | 86 85,66667   | 1             | 1 0         | 835                     |
|     | 80 79         | 1             | 1 0         | 1155                    |
|     | 76 73,33333   | 1             | 5 0,69897   | 729                     |
|     | 86,1 73,13333 | 1             | 1 0         | 3190                    |
|     | 90,2 88,23333 | 1             | 5 0,69897   | 275                     |
|     | 76,8 74,9     | 1             | 3 0,477121  | 1430                    |

|      |          |   |    |          |      |
|------|----------|---|----|----------|------|
| 94   | 93,33333 | 1 | 1  | 0        | 1975 |
| 82   | 81       | 1 | 7  | 0,845098 | 2550 |
| 83   | 82       | 1 | 3  | 0,477121 | 1335 |
| 83   | 82,66667 | 1 | 3  | 0,477121 | 1890 |
| 88   | 87       | 1 | 9  | 0,954243 | 1310 |
| 76   | 76       | 1 | 7  | 0,845098 | 1045 |
| 85   | 85       | 1 | 3  | 0,477121 | 485  |
| 85   | 84,33333 | 1 | 1  | 0        | 2090 |
| 87   | 86       | 1 | 5  | 0,69897  | 880  |
| 83   | 82,33333 | 1 | 3  | 0,477121 | 1830 |
| 69   | 68       | 1 | 11 | 1,041393 | 615  |
| 81   | 79       | 1 | 3  | 0,477121 | 1520 |
| 76   | 73       | 1 | 11 | 1,041393 | 1048 |
| 85   | 81,33333 | 1 | 7  | 0,845098 | 1485 |
| 74,2 | 72,96667 | 1 | 11 | 1,041393 | 2345 |
| 76   | 73,33333 | 1 | 11 | 1,041393 | 785  |
| 76   | 74       | 1 | 7  | 0,845098 | 1097 |
| 77   | 76,33333 | 1 | 3  | 0,477121 | 555  |
| 69   | 67       | 1 | 7  | 0,845098 | 950  |
| 78   | 78       | 1 | 10 | 1        | 615  |
| 81   | 81,33333 | 1 | 1  | 0        | 1610 |



| TOTAL ENERGY EXPENDITURE | TOTAL MISTAKES | LOG TOTAL MISTAKES | % TOTAL MISTAKES |
|--------------------------|----------------|--------------------|------------------|
| 3972,5                   | 7              | 0,84509804         | 18,75            |
| 3799                     | 9              | 0,954242509        | 25               |
| 3910                     | 7              | 0,84509804         | 18,75            |
| 5047,5                   | 5              | 0,698970004        | 12,5             |
| 3981,5                   | 4              | 0,602059991        | 9,375            |
| 7187,5                   | 6              | 0,77815125         | 15,625           |
| 3998                     | 2              | 0,301029996        | 3,125            |
| 12555                    | 20             | 1,301029996        | 59,375           |
| 4732,5                   | 2              | 0,301029996        | 3,125            |
| 6390                     | 12             | 1,079181246        | 34,375           |
| 4689                     | 2              | 0,301029996        | 3,125            |
| 21250                    | 5              | 0,698970004        | 12,5             |
| 5790                     | 1              | 0                  | 0                |
| 8110                     | 2              | 0,301029996        | 3,125            |
| 3502,5                   | 15             | 1,176091259        | 43,75            |
| 4389                     | 7              | 0,84509804         | 18,75            |
| 7907,5                   | 9              | 0,954242509        | 25               |
| 8790                     | 19             | 1,278753601        | 56,25            |
| 6722,5                   | 5              | 0,698970004        | 12,5             |
| 5595,5                   | 6              | 0,77815125         | 15,625           |
| 7247,5                   | 13             | 1,113943352        | 37,5             |
| 7240                     | 1              | 0                  | 0                |
| 2945                     | 8              | 0,903089987        | 21,875           |
| 3430                     | 24             | 1,380211242        | 71,875           |
| 6875                     | 1              | 0                  | 0                |
| 3927,5                   | 8              | 0,903089987        | 21,875           |
| 3900                     | 17             | 1,230448921        | 50               |
| 3005                     | 2              | 0,301029996        | 3,125            |
| 3087                     | 23             | 1,361727836        | 68,75            |
| 1220,5                   | 8              | 0,903089987        | 21,875           |
| 1695                     | 24             | 1,380211242        | 71,875           |
| 3822,5                   | 20             | 1,301029996        | 59,375           |
| 10942,5                  | 24             | 1,380211242        | 71,875           |
| 2442,5                   | 16             | 1,204119983        | 46,875           |
| 5115                     | 3              | 0,477121255        | 6,25             |
| 2935                     | 17             | 1,230448921        | 50               |
| 8305                     | 23             | 1,361727836        | 68,75            |
| 10965                    | 14             | 1,146128036        | 40,625           |
| 4575                     | 22             | 1,342422681        | 65,625           |
| 3560                     | 11             | 1,041392685        | 31,25            |
| 4275                     | 6              | 0,77815125         | 15,625           |
| 1372,5                   | 2              | 0,301029996        | 3,125            |
| 5860                     | 3              | 0,477121255        | 6,25             |
| 3460                     | 11             | 1,041392685        | 31,25            |
| 5092,5                   | 7              | 0,84509804         | 18,75            |
| 2497,5                   | 8              | 0,903089987        | 21,875           |
| 8830                     | 2              | 0,301029996        | 3,125            |
| 885                      | 5              | 0,698970004        | 12,5             |
| 4605                     | 4              | 0,602059991        | 9,375            |

|        |    |             |        |
|--------|----|-------------|--------|
| 6067,5 | 6  | 0,77815125  | 15,625 |
| 7770   | 23 | 1,361727836 | 68,75  |
| 4827,5 | 15 | 1,176091259 | 43,75  |
| 9450   | 7  | 0,84509804  | 18,75  |
| 4895   | 5  | 0,698970004 | 12,5   |
| 4010   | 4  | 0,602059991 | 9,375  |
| 2367,5 | 7  | 0,84509804  | 18,75  |
| 6547,5 | 4  | 0,602059991 | 9,375  |
| 3370   | 7  | 0,84509804  | 18,75  |
| 7840   | 20 | 1,301029996 | 59,375 |
| 2545   | 22 | 1,342422681 | 65,625 |
| 4737,5 | 11 | 1,041392685 | 31,25  |
| 3458   | 4  | 0,602059991 | 9,375  |
| 5392,5 | 12 | 1,079181246 | 34,375 |
| 9340,5 | 15 | 1,176091259 | 43,75  |
| 2905   | 19 | 1,278753601 | 56,25  |
| 3724,5 | 27 | 1,431363764 | 81,25  |
| 1645   | 10 | 1           | 28,125 |
| 3155   | 21 | 1,322219295 | 62,5   |
| 2030   | 9  | 0,954242509 | 25     |
| 5660   | 1  | 0           | 0      |

| TOTAL MIS.RESP | LOG TOTAL MISSED. RESP | TOTAL CORRECT RESP | % TOTAL CORRECT RESP |
|----------------|------------------------|--------------------|----------------------|
| 1              | 0                      | 26                 | 81,25                |
| 2              | 0,301029996            | 23                 | 71,875               |
| 1              | 0                      | 26                 | 81,25                |
| 1              | 0                      | 28                 | 87,5                 |
| 3              | 0,477121255            | 27                 | 84,375               |
| 1              | 0                      | 27                 | 84,375               |
| 1              | 0                      | 31                 | 96,875               |
| 3              | 0,477121255            | 11                 | 34,375               |
| 2              | 0,301029996            | 30                 | 93,75                |
| 1              | 0                      | 21                 | 65,625               |
| 1              | 0                      | 31                 | 96,875               |
| 4              | 0,602059991            | 25                 | 78,125               |
| 1              | 0                      | 32                 | 100                  |
| 1              | 0                      | 31                 | 96,875               |
| 2              | 0,301029996            | 17                 | 53,125               |
| 1              | 0                      | 26                 | 81,25                |
| 2              | 0,301029996            | 23                 | 71,875               |
| 3              | 0,477121255            | 12                 | 37,5                 |
| 1              | 0                      | 28                 | 87,5                 |
| 8              | 0,903089987            | 20                 | 62,5                 |
| 3              | 0,477121255            | 18                 | 56,25                |
| 1              | 0                      | 32                 | 100                  |
| 3              | 0,477121255            | 23                 | 71,875               |
| 4              | 0,602059991            | 6                  | 18,75                |
| 1              | 0                      | 32                 | 100                  |
| 19             | 1,278753601            | 7                  | 21,875               |
| 5              | 0,698970004            | 12                 | 37,5                 |
| 2              | 0,301029996            | 30                 | 93,75                |
| 2              | 0,301029996            | 9                  | 28,125               |
| 1              | 0                      | 25                 | 78,125               |
| 4              | 0,602059991            | 6                  | 18,75                |
| 9              | 0,954242509            | 5                  | 15,625               |
| 1              | 0                      | 9                  | 28,125               |
| 6              | 0,77815125             | 12                 | 37,5                 |
| 1              | 0                      | 30                 | 93,75                |
| 11             | 1,041392685            | 6                  | 18,75                |
| 8              | 0,903089987            | 3                  | 9,375                |
| 10             | 1                      | 10                 | 31,25                |
| 10             | 1                      | 2                  | 6,25                 |
| 10             | 1                      | 13                 | 40,625               |
| 10             | 1                      | 18                 | 56,25                |
| 1              | 0                      | 31                 | 96,875               |
| 1              | 0                      | 30                 | 93,75                |
| 1              | 0                      | 22                 | 68,75                |
| 3              | 0,477121255            | 24                 | 75                   |
| 2              | 0,301029996            | 24                 | 75                   |
| 4              | 0,602059991            | 28                 | 87,5                 |
| 1              | 0                      | 28                 | 87,5                 |
| 10             | 1                      | 20                 | 62,5                 |

|    |             |    |        |
|----|-------------|----|--------|
| 1  | 0           | 27 | 84,375 |
| 2  | 0,301029996 | 9  | 28,125 |
| 8  | 0,903089987 | 11 | 34,375 |
| 2  | 0,301029996 | 25 | 78,125 |
| 6  | 0,77815125  | 23 | 71,875 |
| 2  | 0,301029996 | 28 | 87,5   |
| 16 | 1,204119983 | 11 | 34,375 |
| 1  | 0           | 29 | 90,625 |
| 25 | 1,397940009 | 2  | 6,25   |
| 6  | 0,77815125  | 8  | 25     |
| 10 | 1           | 2  | 6,25   |
| 6  | 0,77815125  | 17 | 53,125 |
| 3  | 0,477121255 | 27 | 84,375 |
| 1  | 0           | 21 | 65,625 |
| 3  | 0,477121255 | 16 | 50     |
| 5  | 0,698970004 | 10 | 31,25  |
| 2  | 0,301029996 | 5  | 15,625 |
| 7  | 0,84509804  | 17 | 53,125 |
| 4  | 0,602059991 | 9  | 28,125 |
| 8  | 0,903089987 | 17 | 53,125 |
| 1  | 0           | 32 | 100    |

| AVE.RT OF ALL CORRECT RESP | S.D OF RT | GREY MISTAKES | GREY MISSED | GREY CORRECT |
|----------------------------|-----------|---------------|-------------|--------------|
| 1658                       | 313       | 0             | 0           | 8            |
| 1605                       | 470       | 1             | 0           | 7            |
| 1776                       | 482       | 0             | 0           | 8            |
| 1610                       | 312       | 0             | 0           | 8            |
| 1922                       | 411       | 1             | 1           | 6            |
| 1339                       | 432       | 0             | 0           | 8            |
| 1148                       | 212       | 0             | 0           | 8            |
| 827                        | 131       | 4             | 0           | 4            |
| 1830                       | 482       | 0             | 1           | 7            |
| 1283                       | 410       | 3             | 0           | 5            |
| 1126                       | 268       | 0             | 0           | 8            |
| 1706                       | 562       | 0             | 0           | 8            |
| 1424                       | 392       | 0             | 0           | 8            |
| 1487                       | 294       | 0             | 0           | 8            |
| 1575                       | 493       | 2             | 1           | 5            |
| 1522                       | 410       | 2             | 0           | 6            |
| 1479                       | 515       | 3             | 0           | 5            |
| 1676                       | 276       | 1             | 2           | 5            |
| 996                        | 205       | 1             | 0           | 7            |
| 2164                       | 505       | 1             | 2           | 5            |
| 2147                       | 592       | 0             | 0           | 8            |
| 1346                       | 302       | 0             | 0           | 8            |
| 2087                       | 466       | 0             | 0           | 8            |
| 1559                       | 744       | 4             | 1           | 3            |
| 1195                       | 383       | 0             | 0           | 8            |
| 1780                       | 906       | 0             | 7           | 1            |
| 2195                       | 398       | 4             | 0           | 4            |
| 1035                       | 356       | 1             | 0           | 7            |
| 2121                       | 940       | 0             | 0           | 8            |
| 1387                       | 571       | 2             | 0           | 6            |
| 1241                       | 247       | 6             | 1           | 1            |
| 1249                       | 453       | 6             | 2           | 0            |
| 1659                       | 442       | 2             | 0           | 6            |
| 2051                       | 614       | 1             | 1           | 6            |
| 1085                       | 212       | 0             | 0           | 8            |
| 1506                       | 645       | 5             | 1           | 2            |
| 878                        | 225       | 7             | 1           | 0            |
| 1800                       | 658       | 1             | 5           | 2            |
| 1647                       | 99        | 4             | 2           | 2            |
| 946                        | 442       | 2             | 4           | 2            |
| 2002                       | 411       | 2             | 2           | 4            |
| 1266                       | 423       | 1             | 0           | 7            |
| 1559                       | 393       | 1             | 0           | 7            |
| 1490                       | 484       | 1             | 0           | 7            |
| 1834                       | 447       | 0             | 0           | 8            |
| 1631                       | 505       | 3             | 1           | 4            |
| 969                        | 236       | 0             | 0           | 8            |
| 1667                       | 432       | 0             | 0           | 8            |
| 1766                       | 567       | 0             | 6           | 2            |

|      |     |   |   |   |
|------|-----|---|---|---|
| 1402 | 367 | 1 | 0 | 7 |
| 1224 | 382 | 1 | 0 | 7 |
| 1839 | 701 | 4 | 1 | 3 |
| 1920 | 440 | 0 | 0 | 8 |
| 2105 | 522 | 0 | 1 | 7 |
| 1499 | 399 | 1 | 1 | 6 |
| 1731 | 574 | 1 | 5 | 2 |
| 1502 | 476 | 0 | 0 | 8 |
| 1693 | 920 | 2 | 5 | 1 |
| 1247 | 430 | 3 | 1 | 4 |
| 2758 | 363 | 4 | 3 | 1 |
| 1347 | 508 | 0 | 1 | 7 |
| 1612 | 524 | 0 | 0 | 8 |
| 1258 | 178 | 2 | 0 | 6 |
| 1857 | 555 | 2 | 1 | 5 |
| 1976 | 689 | 3 | 1 | 4 |
| 1503 | 695 | 3 | 0 | 5 |
| 2165 | 556 | 0 | 2 | 6 |
| 957  | 202 | 1 | 1 | 6 |
| 2007 | 725 | 0 | 4 | 4 |
| 1730 | 439 | 0 | 0 | 8 |

| % GREY CORRECT | AVE REC TIME OF CORRECT GREY (NEUTRAL) WORDS | GREY S.D RT |
|----------------|----------------------------------------------|-------------|
| 100            | 1549                                         | 306         |
| 87,5           | 1892                                         | 471         |
| 100            | 1896                                         | 465         |
| 100            | 1626                                         | 263         |
| 75             | 2201                                         | 506         |
| 100            | 1464                                         | 552         |
| 100            | 1158                                         | 307         |
| 50             | 918                                          | 169         |
| 87,5           | 1776                                         | 525         |
| 62,5           | 1287                                         | 290         |
| 100            | 1327                                         | 250         |
| 100            | 1465                                         | 584         |
| 100            | 1277                                         | 129         |
| 100            | 1538                                         | 221         |
| 62,5           | 1250                                         | 643         |
| 75             | 1732                                         | 304         |
| 62,5           | 1650                                         | 355         |
| 62,5           | 1677                                         | 186         |
| 87,5           | 1062                                         | 123         |
| 62,5           | 2262                                         | 609         |
| 100            | 2080                                         | 686         |
| 100            | 1442                                         | 377         |
| 100            | 1919                                         | 526         |
| 37,5           | 2106                                         | 686         |
| 100            | 1492                                         | 177         |
| 12,5           | 726                                          | 0           |
| 50             | 2291                                         | 319         |
| 87,5           | 1277                                         | 280         |
| 100            | 2010                                         | 940         |
| 75             | 1098                                         | 420         |
| 12,5           | 1602                                         | 0           |
| 0              | 0                                            | 0           |
| 75             | 1712                                         | 440         |
| 75             | 1763                                         | 377         |
| 100            | 1172                                         | 228         |
| 25             | 1735                                         | 408         |
| 0              | 0                                            | 0           |
| 25             | 1603                                         | 158         |
| 25             | 1647                                         | 99          |
| 25             | 987                                          | 279         |
| 50             | 1922                                         | 248         |
| 87,5           | 1550                                         | 403         |
| 87,5           | 1363                                         | 275         |
| 87,5           | 1773                                         | 529         |
| 100            | 1893                                         | 412         |
| 50             | 1765                                         | 232         |
| 100            | 1151                                         | 127         |
| 100            | 1972                                         | 340         |
| 25             | 1627                                         | 1054        |

|      |      |      |
|------|------|------|
| 87,5 | 1786 | 204  |
| 87,5 | 1226 | 429  |
| 37,5 | 1482 | 785  |
| 100  | 1978 | 450  |
| 87,5 | 2409 | 557  |
| 75   | 1497 | 347  |
| 25   | 1998 | 517  |
| 100  | 1750 | 616  |
| 12,5 | 2343 | 0    |
| 50   | 1240 | 551  |
| 12,5 | 3015 | 0    |
| 87,5 | 1438 | 594  |
| 100  | 1615 | 612  |
| 75   | 1334 | 148  |
| 62,5 | 1590 | 267  |
| 50   | 1558 | 382  |
| 62,5 | 1503 | 695  |
| 75   | 2483 | 582  |
| 75   | 941  | 151  |
| 50   | 2087 | 1021 |
| 100  | 1997 | 427  |



NUMBER OF CORRECT COLOUR-WORD RESPONSES (INCONGRUENT)

- 18
- 16
- 18
- 20
- 21
- 19
- 23
- 7
- 23
- 16
- 23
- 17
- 24
- 23
- 12
- 20
- 18
- 7
- 21
- 15
- 10
- 24
- 15
- 3
- 24
- 6
- 8
- 23
- 1
- 19
- 5
- 5
- 3
- 6
- 22
- 4
- 3
- 8
- 0
- 11
- 14
- 24
- 23
- 15
- 16
- 20
- 20
- 20
- 18

20  
2  
8  
17  
16  
22  
9  
21  
1  
4  
1  
10  
19  
15  
11  
6  
0  
11  
3  
13  
24

% COLOUR-WORDS CORRECT RESP (INCONGRUENT)

75  
66,6666667  
75  
83,3333333  
87,5  
79,1666667  
95,8333333  
29,1666667  
95,8333333  
66,6666667  
95,8333333  
70,8333333  
100  
95,8333333  
50  
83,3333333  
75  
29,1666667  
87,5  
62,5  
41,6666667  
100  
62,5  
12,5  
100  
25  
33,3333333  
95,8333333  
4,1666667  
79,1666667  
20,8333333  
20,8333333  
12,5  
25  
91,6666667  
16,6666667  
12,5  
33,3333333  
0  
45,8333333  
58,3333333  
100  
95,8333333  
62,5  
66,6666667  
83,3333333  
83,3333333  
83,3333333  
75

83,33333333  
8,33333333  
33,33333333  
70,83333333  
66,66666667  
91,66666667  
37,5  
87,5  
4,166666667  
16,66666667  
4,166666667  
41,66666667  
79,16666667  
62,5  
45,83333333  
25  
0  
45,83333333  
12,5  
54,16666667  
100

AVE. REC TIME OF CORRECT COLOUR WORDS (INCONGRUENT)

1707  
1480  
1722  
1604  
1843  
1287  
1144  
775  
1847  
1281  
1056  
1819  
1473  
1470  
1711  
1732  
1432  
1675  
974  
2130  
2201  
1314  
2177  
1012  
1096  
1956  
2219  
961  
3008  
1478  
1169  
1249  
1553  
2340  
1053  
1392  
878  
1850  
0  
939  
2025  
1183  
1619  
1358  
1805  
1605  
897  
1544  
1782

1268  
1218  
1973  
1893  
1972  
1500  
1672  
1407  
1042  
1253  
2501  
1283  
1611  
1228  
1979  
2255  
0  
1992  
989  
1982  
1642

AVE. REC TIME OF INCORRECT COLOUR -WORDS (INCONGRUENT)

1349  
1454  
1132  
1818  
2602  
1532  
1395  
750  
1781  
981  
1206  
1160  
0  
1417  
1266  
1092  
1268  
1497  
926  
2279  
2244  
0  
2470  
1079  
0  
1921  
2149  
0  
1391  
1197  
1112  
1464  
1419  
1871  
808  
1458  
1105  
1393  
1787  
790  
1743  
0  
1612  
1891  
1746  
2003  
908  
1910  
1477

1501  
1318  
1617  
1974  
2377  
1540  
2084  
2086  
1675  
963  
2126  
1718  
1779  
1048  
1822  
1579  
1608  
1491  
1008  
1556  
0



| AVE. REC TIME OF INCORRECT GREY WORDS (NEUTRAL) | CORR: AVE RT  |
|-------------------------------------------------|---------------|
|                                                 | 0 0,015681544 |
| 2133                                            | 0,014330218   |
| 0                                               | 0,01463964    |
| 0                                               | 0,017391304   |
| 3197                                            | 0,014047867   |
| 0                                               | 0,020164302   |
| 0                                               | 0,027003484   |
| 852                                             | 0,013301088   |
| 0                                               | 0,016393443   |
| 1245                                            | 0,016367888   |
| 0                                               | 0,027531083   |
| 0                                               | 0,014654162   |
| 0                                               | 0,02247191    |
| 0                                               | 0,020847344   |
| 1091                                            | 0,010793651   |
| 1423                                            | 0,017082786   |
| 843                                             | 0,015551048   |
| 1103                                            | 0,007159905   |
| 957                                             | 0,02811245    |
| 1972                                            | 0,009242144   |
| 0                                               | 0,008383791   |
| 0                                               | 0,023774146   |
| 0                                               | 0,011020604   |
| 1308                                            | 0,003848621   |
| 0                                               | 0,026778243   |
| 0                                               | 0,003932584   |
| 1845                                            | 0,00546697    |
| 1406                                            | 0,028985507   |
| 0                                               | 0,004243281   |
| 1510                                            | 0,018024513   |
| 1675                                            | 0,004834811   |
| 1281                                            | 0,004003203   |
| 1369                                            | 0,005424955   |
| 1388                                            | 0,005850804   |
| 0                                               | 0,02764977    |
| 1184                                            | 0,003984064   |
| 825                                             | 0,003416856   |
| 979                                             | 0,005555556   |
| 1993                                            | 0,001214329   |
| 693                                             | 0,013742072   |
| 2140                                            | 0,008991009   |
| 1805                                            | 0,024486572   |
| 1287                                            | 0,019243105   |
| 1272                                            | 0,014765101   |
| 0                                               | 0,01308615    |
| 2204                                            | 0,014714899   |
| 0                                               | 0,028895769   |
| 0                                               | 0,016796641   |
| 0                                               | 0,011325028   |

|      |             |
|------|-------------|
| 1115 | 0,019258203 |
| 1966 | 0,007352941 |
| 2327 | 0,005981512 |
| 0    | 0,013020833 |
| 0    | 0,010926366 |
| 2390 | 0,018679119 |
| 855  | 0,006354708 |
| 855  | 0,01930759  |
| 1337 | 0,001181335 |
| 1011 | 0,006415397 |
| 1106 | 0,000725163 |
| 0    | 0,012620638 |
| 0    | 0,01674938  |
| 1249 | 0,016693164 |
| 2186 | 0,008616047 |
| 2202 | 0,005060729 |
| 1967 | 0,00332668  |
| 0    | 0,007852194 |
| 740  | 0,009404389 |
| 0    | 0,008470354 |
| 0    | 0,01849711  |

AVE. REC TIME OF ALL MISTAKES

1349  
1539  
1132  
1818  
2800  
1532  
1395  
772  
1781  
1053  
1206  
1160  
0  
1417  
1241  
1202  
1709  
1475  
934  
2217  
2244  
0  
2470  
1119  
0  
1921  
2073  
1406  
1391  
1286  
1259  
1406  
1415  
1838  
808  
1372  
1016  
1361  
1826  
770  
1902  
1805  
1450  
1829  
1746  
2089  
908  
1910  
1477

1424  
1347  
1820  
1974  
2377  
1823  
1879  
2086  
1562  
970  
1932  
1718  
1779  
1085  
1874  
1683  
1650  
1491  
994  
1556  
0
